# Supplementary material for: Comparative Assessment of NMR Probes for the Experimental Description of Protein Folding Pathways with High-Pressure NMR
Source: MDPI journal article supplement (doi:10.3390/biology10070656), 2021-07-12
Supplement: s1 [file s1]

**Table S1: Thermodynamic parameters values for  $\Delta G^0$ ,  $\Delta V^0$  and  $P_{1/2}$  (half-denaturation pressure:  $P_{1/2} = \Delta G^0/\Delta V^0$ ) obtained for  $\Delta$ -PHS SNase from the fit of residue-specific denaturation curves with equation [1] and for the different NMR probes ( $CH_3$ ,  $C\alpha$  and  $NH$  groups).**

[illegible]



|     |      |    |     |     |      |    |      |     |     |    |      |     |      |     |     |   |      |     |
|-----|------|----|-----|-----|------|----|------|-----|-----|----|------|-----|------|-----|-----|---|------|-----|
| 93  |      |    |     |     |      |    | 2769 | 155 | 103 | 6  | 1125 | 126 | 2076 | 80  | 82  | 3 | 1056 | 77  |
| 94  |      |    |     |     |      |    | 2304 | 174 | 88  | 6  | 1094 | 162 | 2307 | 60  | 90  | 2 | 1076 | 54  |
| 95  |      |    |     |     |      |    | 981  | 21  | 64  | 1  | 638  | 22  | 2415 | 58  | 95  | 2 | 1062 | 50  |
| 96  |      |    |     |     |      |    | 569  | 279 | 38  | 8  | 629  | 440 | 2333 | 62  | 91  | 2 | 1075 | 54  |
| 97  |      |    |     |     |      |    |      |     |     |    |      |     |      |     |     |   |      |     |
| 98  | 2703 | 35 | 103 | 1.3 | 1097 | 28 |      |     |     |    |      |     |      |     |     |   |      |     |
| 99  | 4355 | 47 | 163 | 1.8 | 1118 | 24 | 2744 | 128 | 83  | 4  | 1384 | 135 | 2248 | 122 | 90  | 4 | 1046 | 107 |
| 100 |      |    |     |     |      |    | 3718 | 59  | 132 | 2  | 1177 | 38  | 2247 | 50  | 90  | 2 | 1043 | 43  |
| 101 |      |    |     |     |      |    | 2716 | 188 | 103 | 8  | 1108 | 158 | 2219 | 57  | 89  | 2 | 1043 | 51  |
| 102 | 2540 | 37 | 98  | 1.3 | 1087 | 30 |      |     |     |    |      |     |      |     |     |   |      |     |
| 103 | 1576 | 21 | 52  | 0.6 | 1273 | 33 | 3029 | 218 | 123 | 9  | 1029 | 148 | 2975 | 98  | 126 | 4 | 987  | 62  |
| 104 | 2827 | 52 | 118 | 2.0 | 1004 | 36 |      |     |     |    |      |     |      |     |     |   |      |     |
| 105 |      |    |     |     |      |    |      |     |     |    |      |     |      |     |     |   |      |     |
| 106 |      |    |     |     |      |    |      |     |     |    |      |     |      |     |     |   |      |     |
| 107 |      |    |     |     |      |    |      |     |     |    |      |     |      |     |     |   |      |     |
| 108 | 1398 | 45 | 60  | 1.6 | 979  | 57 |      |     |     |    |      |     |      |     |     |   |      |     |
| 109 |      |    |     |     |      |    |      |     |     |    |      |     |      |     |     |   |      |     |
| 110 |      |    |     |     |      |    | 2732 | 93  | 105 | 4  | 1091 | 75  | 2104 | 41  | 85  | 2 | 1035 | 38  |
| 111 | 4525 | 72 | 175 | 2.7 | 1082 | 34 |      |     |     |    |      |     |      |     |     |   |      |     |
| 112 |      |    |     |     |      |    | 2094 | 66  | 87  | 3  | 1002 | 62  | 2165 | 49  | 90  | 2 | 1004 | 43  |
| 113 |      |    |     |     |      |    |      |     |     |    |      |     |      |     |     |   |      |     |
| 114 |      |    |     |     |      |    |      |     |     |    |      |     |      |     |     |   |      |     |
| 115 |      |    |     |     |      |    |      |     |     |    |      |     |      |     |     |   |      |     |
| 116 |      |    |     |     |      |    | 1838 | 148 | 62  | 5  | 1236 | 204 | 2331 | 98  | 93  | 4 | 1049 | 85  |
| 117 |      |    |     |     |      |    |      |     |     |    |      |     |      |     |     |   |      |     |
| 118 |      |    |     |     |      |    |      |     |     |    |      |     |      |     |     |   |      |     |
| 119 |      |    |     |     |      |    |      |     |     |    |      |     |      |     |     |   |      |     |
| 120 | 2010 | 38 | 79  | 1.4 | 1058 | 38 | 2948 | 140 | 107 | 5  | 1149 | 110 | 2398 | 40  | 94  | 1 | 1067 | 34  |
| 121 |      |    |     |     |      |    |      |     |     |    |      |     |      |     |     |   |      |     |
| 122 |      |    |     |     |      |    |      |     |     |    |      |     |      |     |     |   |      |     |
| 123 |      |    |     |     |      |    | 3083 | 73  | 105 | 3  | 1230 | 60  | 2584 | 68  | 109 | 3 | 988  | 50  |
| 124 |      |    |     |     |      |    | 2373 | 50  | 104 | 2  | 955  | 39  | 2426 | 54  | 96  | 2 | 1062 | 45  |
| 125 | 3865 | 41 | 135 | 1.5 | 1200 | 26 |      |     |     |    |      |     |      |     |     |   |      |     |
| 126 |      |    |     |     |      |    | 1376 | 59  | 76  | 3  | 762  | 58  | 2096 | 35  | 82  | 1 | 1066 | 35  |
| 127 |      |    |     |     |      |    | 2112 | 95  | 87  | 4  | 1019 | 90  | 2327 | 32  | 91  | 1 | 1066 | 28  |
| 128 | 2630 | 64 | 100 | 2.4 | 1103 | 54 |      |     |     |    |      |     |      |     |     |   |      |     |
| 129 |      |    |     |     |      |    | 3649 | 208 | 112 | 6  | 1366 | 156 | 2286 | 35  | 90  | 1 | 1068 | 32  |
| 130 | 2265 | 34 | 86  | 1.2 | 1106 | 32 |      |     |     |    |      |     |      |     |     |   |      |     |
| 131 |      |    |     |     |      |    | 3220 | 62  | 105 | 2  | 1279 | 50  | 2380 | 39  | 94  | 1 | 1059 | 33  |
| 132 | 3223 | 59 | 107 | 2.0 | 1264 | 46 |      |     |     |    |      |     |      |     |     |   |      |     |
| 133 |      |    |     |     |      |    | 2407 | 128 | 93  | 5  | 1086 | 115 | 2410 | 41  | 93  | 1 | 1083 | 35  |
| 134 |      |    |     |     |      |    |      |     |     |    |      |     |      |     |     |   |      |     |
| 135 |      |    |     |     |      |    | 235  | 297 | 29  | 6  | 344  | 506 | 2310 | 42  | 91  | 1 | 1064 | 37  |
| 136 |      |    |     |     |      |    | 2378 | 196 | 100 | 8  | 997  | 163 | 2199 | 35  | 89  | 1 | 1037 | 32  |
| 137 |      |    |     |     |      |    |      |     |     |    |      |     |      |     |     |   |      |     |
| 138 |      |    |     |     |      |    | 3716 | 331 | 123 | 12 | 1266 | 232 | 2484 | 55  | 98  | 2 | 1059 | 45  |
| 139 | 2198 | 68 | 89  | 2.5 | 1037 | 61 |      |     |     |    |      |     |      |     |     |   |      |     |







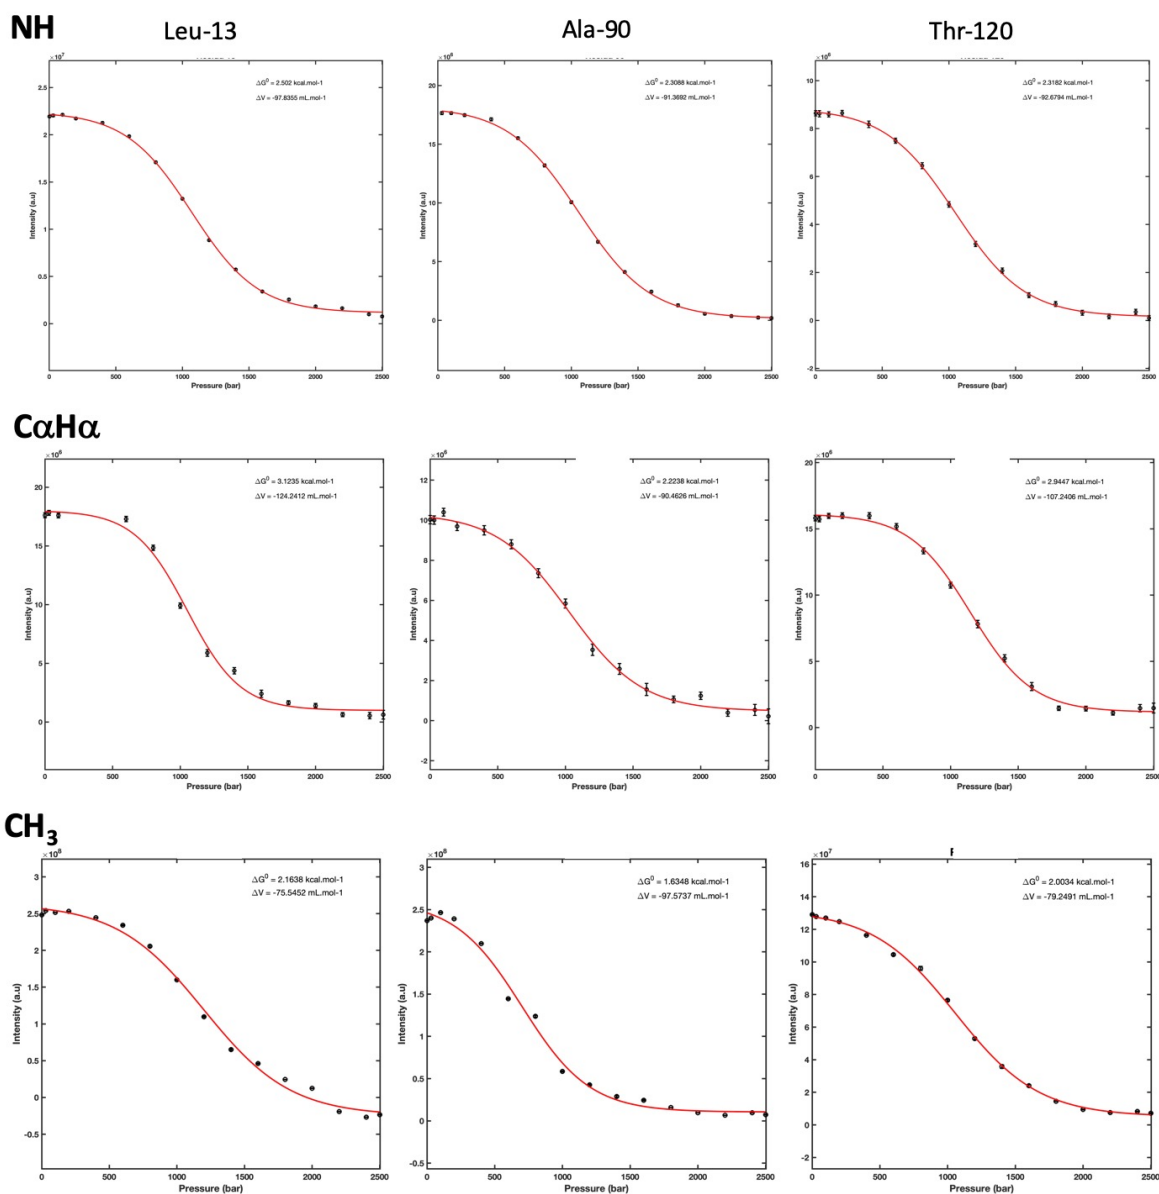

**Figure S4: Representative examples of experimental fits** obtained for the decrease in intensity with pressure of NH, CaHa, and CH<sub>3</sub> cross-peaks (from top to bottom) for the corresponding residues (L13, A90 and T120, as indicated on top of the graph) with Eq. [1] (Materials and Methods) implemented on an in-house MATLAB software. The complete collection of fits is available upon request to the corresponding authors.

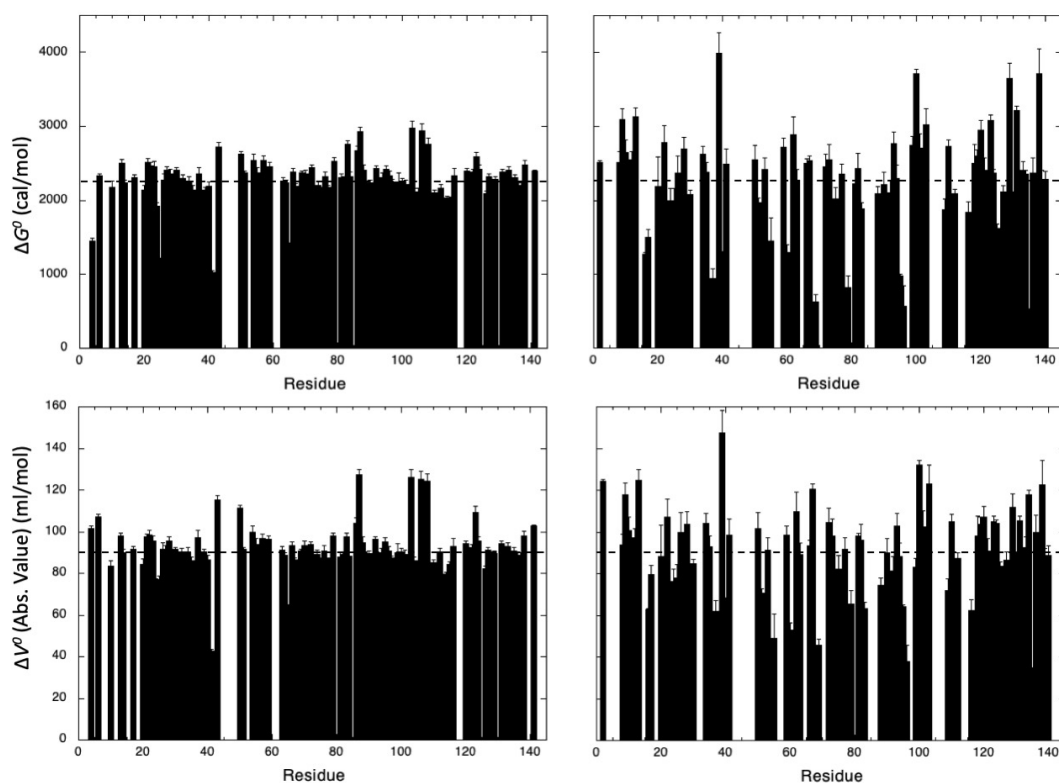

**Figure S5. Thermodynamic parameters measured for the unfolding reaction of  $\Delta$ +PHS SNase.**  $\Delta G^0$  (upper panels) and  $\Delta V^0$  (absolute value, lower panels) obtained from the fit with Equation (1) of the pressure-dependent sigmoidal decrease of the residue cross-peak intensities of NH amide groups (left) and CaHa groups (right). The dashed lines represent the mean values of the measured thermodynamic parameters. Contrary to Figure 4, the values reported here concern all NH and CaHa groups for which accurate residue-specific denaturation curves has been obtained.



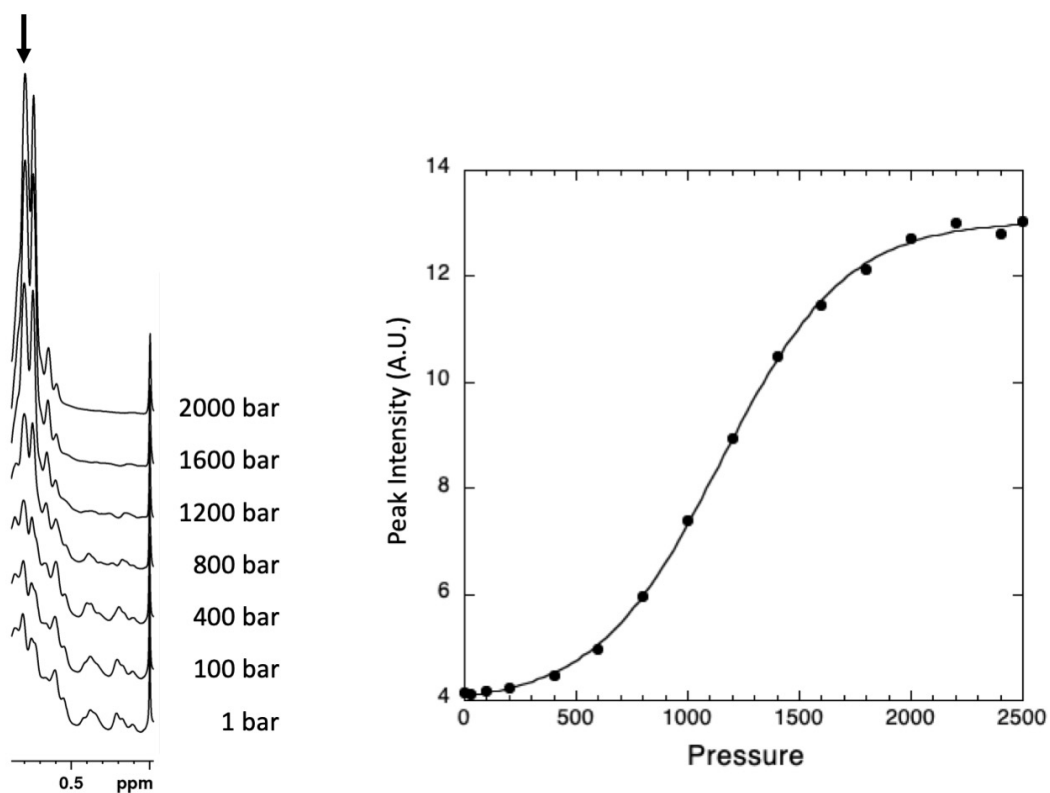

**Figure S6. Monitoring the unfolding reaction of  $\Delta$ +PHS SNase with 1D HP-NMR spectroscopy.** Left: zoom on the methyl resonance region of the proton NMR spectra of  $\Delta$ +PHS SNase recorded at increasing pressure. The arrow indicates the resonance (0.8 ppm) used to follow the unfolding reaction: it corresponds to the resonance of unfolded  $\text{CH}_3$  that increases with pressure. Right: denaturation curve obtained from the fit of the evolution with pressure of the denatured methyl resonance of with a two states equilibrium equation (Equ.[1]).

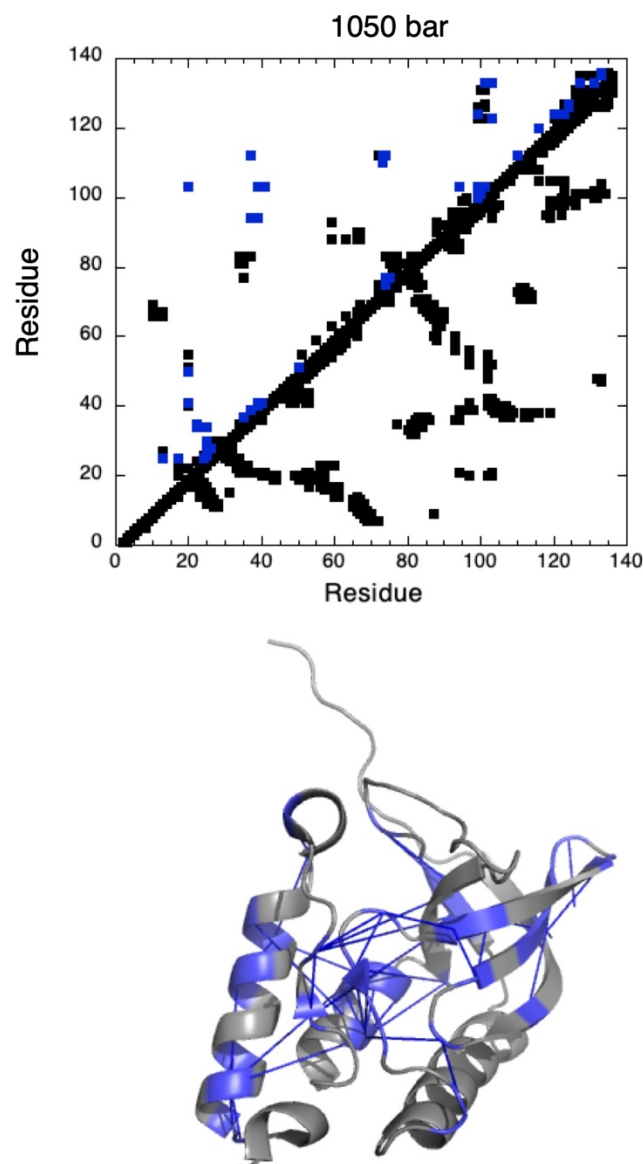

**Figure S7. Fractional contact map obtained at 1050 bar from NH probes.** Upper panel: contact maps built from the crystal structure of  $\Delta$ +PHS Snase (PDB ID: 3LX0) at 1050 bar. Contacts below the diagonal have been calculated with CMview: they correspond to residue where the distance to the corresponding  $C\alpha$  is lower than 8.5 Å. Above the diagonal, the contacts displayed correspond to residues for which fractional probability can be measured from normalized residue-specific denaturation curves obtained from NH cross-peaks. In addition, contacts have been colored in blue when contact probabilities  $P_{ij}$  lower than 0.5 are observed. Lower panel: visualization of the probabilities of contact on ribbon representations of  $\Delta$ +PHS SNase at 1050 bar. The blue lines represent contacts that are significantly weakened ( $P_{ij} \leq 0.5$ ) at the indicated pressure. Residues involved in these contacts are also colored in blue.
